# Supplementary material for: Association of the Telomerase Reverse Transcriptase rs10069690 Polymorphism with the Risk, Age at Onset and Prognosis of Triple Negative Breast Cancer
Source: MDPI journal article supplement (doi:10.3390/ijms24031825), 2023-01-17
Supplement: s1 [file s1]

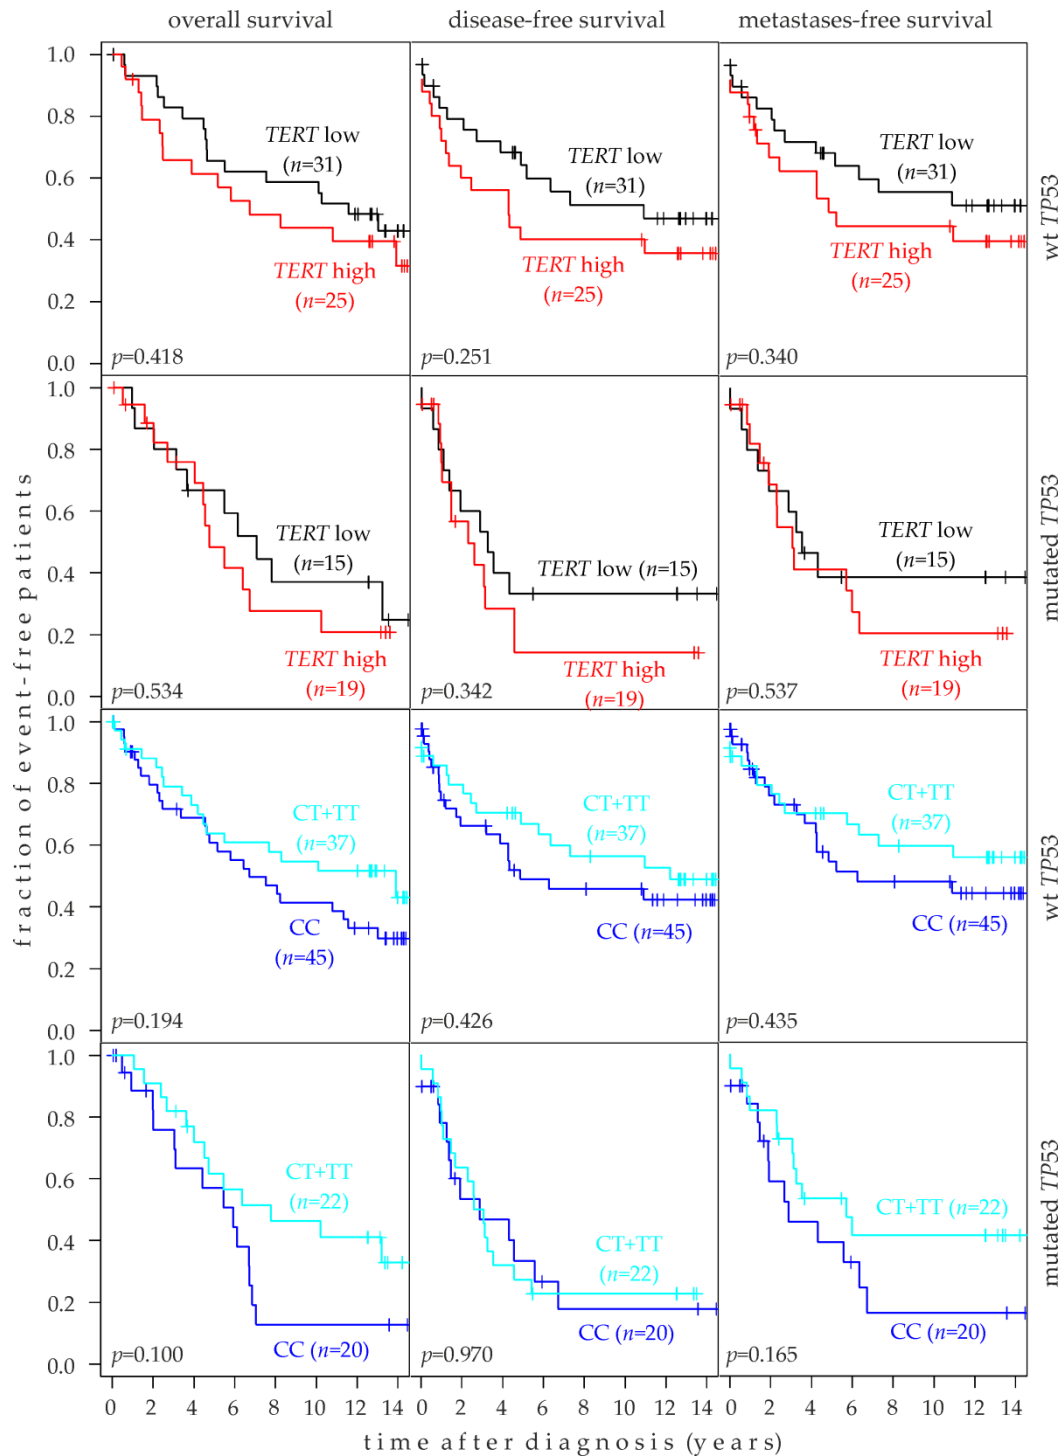

**Figure S1.** Association of *TERT* mRNA expression and rs10069690 genotypes with the survival of human breast cancer patients with wildtype or mutated *TP53*. Patients with CT and TT genotypes were combined into one group, and compared to CC patients. Kaplan-Meier analyses of the overall survival, disease-free survival and metastasis-free survival in patients with wildtype (wt) *TP53* (top row, *n*=56 and third row, *n*=82), or mutated *TP53* (second row; *n*=34 and bottom row, *n*=42) are shown. *TERT* high, *TERT* expression above the median of the study population (*n*=106); *TERT* low, relative *TERT* expression below the median.
