# Supplementary material for: Association of the Telomerase Reverse Transcriptase rs10069690 Polymorphism with the Risk, Age at Onset and Prognosis of Triple Negative Breast Cancer
Source: MDPI journal article supplement (doi:10.3390/ijms24031825), 2023-01-17
Supplement: s1 [file s1]

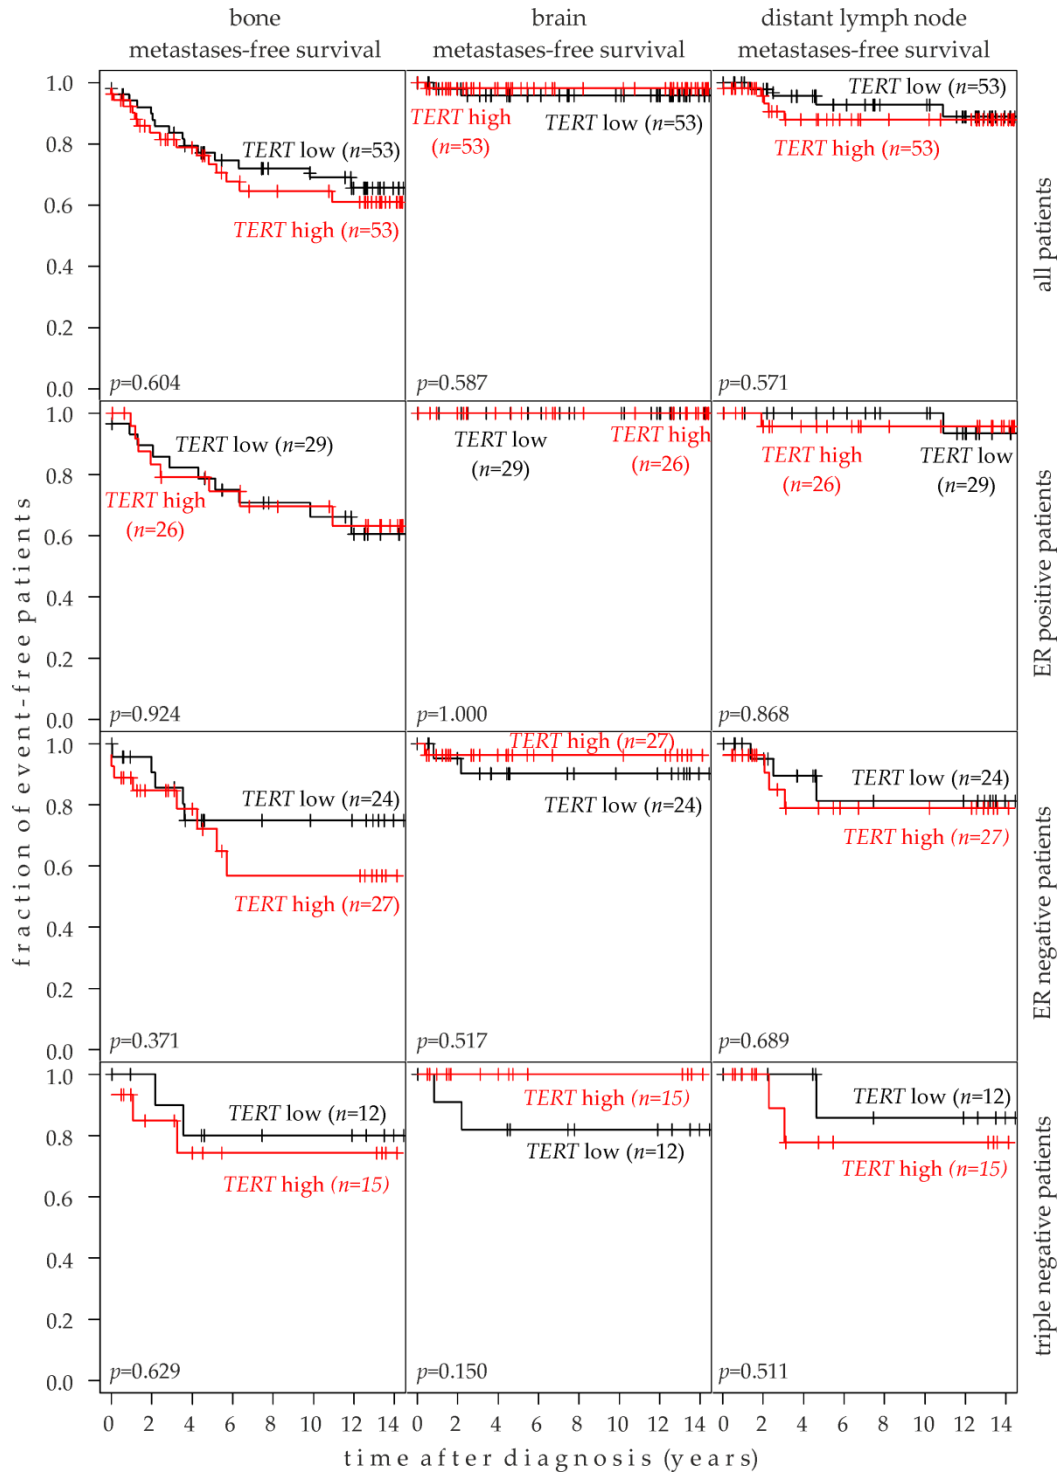

**Figure S2.** Association of *TERT* mRNA expression with the target tissue specific metastasis-free survival of human breast cancer patients. Kaplan-Meier analyses of the bone metastasis-free survival, brain metastasis-free survival and survival free of metastasis to distant lymph nodes in unselected patients (top row;  $n=106$ ), estrogen receptor (ER) positive patients (second row;  $n=55$ ), ER negative patients (third row;  $n=51$ ), and triple negative patients (bottom row;  $n=27$ ) are shown. Numbers ( $n$ ) of patients in each group and  $p$ -values ( $p$ ) are indicated. *TERT* high, *TERT* expression above the median of the study population ( $n=106$ ); *TERT* low, relative *TERT* expression below the median.
