# Supplementary material for: Association of the Telomerase Reverse Transcriptase rs10069690 Polymorphism with the Risk, Age at Onset and Prognosis of Triple Negative Breast Cancer
Source: MDPI journal article supplement (doi:10.3390/ijms24031825), 2023-01-17
Supplement: s1 [file s1]

**Table S2.** Pertinent characteristics of the cell lines analysed.

| cell line  | RRID      | cell type | rs10069690<br>genotype | ER<br>status | <i>TERT</i> mRNA levels<br>(linear) (log[2]) |       |
|------------|-----------|-----------|------------------------|--------------|----------------------------------------------|-------|
| HMEC       | CVCL_0307 | non-tumor | CT                     | na           | 0.78                                         | -0.32 |
| Hs 578Bst  | CVCL_0807 | non-tumor | CT                     | na           | na                                           | na    |
| MCF-10A    | CVCL_0598 | non-tumor | CC                     | neg          | 71.21                                        | 6.19  |
| MCF-10F    | CVCL_3633 | non-tumor | CC                     | na           | 1.22                                         | 0.32  |
| AU565      | CVCL_1074 | tumor     | CC                     | neg          | 51.45                                        | 5.72  |
| BT-474     | CVCL_0179 | tumor     | CT                     | pos          | 250.44                                       | 8.00  |
| CAL-51     | CVCL_1110 | tumor     | CC                     | neg          | 605.29                                       | 9.28  |
| CAMA-1     | CVCL_1115 | tumor     | CC                     | pos          | 328.29                                       | 8.39  |
| HCC1143    | CVCL_1245 | tumor     | CC                     | neg          | 2,063.56                                     | 11.05 |
| HCC1937    | CVCL_0290 | tumor     | TT                     | neg          | 140.78                                       | 7.17  |
| Hs 578T    | CVCL_0332 | tumor     | CT                     | neg          | 3.46                                         | 1.83  |
| KPL-1      | CVCL_2094 | tumor     | CC                     | pos          | 1,615.30                                     | 10.69 |
| MCF-7      | CVCL_0031 | tumor     | CC                     | pos          | 334.19                                       | 8.42  |
| MDA-MB-231 | CVCL_0062 | tumor     | CC                     | neg          | 1,605.31                                     | 10.68 |
| MDA-MB-453 | CVCL_0418 | tumor     | CT                     | neg          | 158.61                                       | 7.35  |
| MDA-MB-468 | CVCL_0419 | tumor     | CT                     | neg          | 82.92                                        | 6.41  |
| SK-BR-3    | CVCL_0033 | tumor     | CT                     | neg          | 1,007.59                                     | 10.01 |
| T-47D      | CVCL_0553 | tumor     | CC                     | pos          | 339.36                                       | 8.44  |
| ZR-75-1    | CVCL_0588 | tumor     | CC                     | pos          | 2,258.41                                     | 11.18 |

Hs 578Bst, MCF-10A and MCF-10F are immortalized cell lines, and HMEC are finite-lifespan cells derived from normal breast tissue. MCF-10A and MCF-10F, as well as Hs 478Bst and Hs578T were derived from the same donor, respectively. *TERT* mRNA levels are expressed relative to the mean level of the two non-tumor cell lines HMEC and MCF-10F. Thus, linear values are equivalent to  $2^{-\Delta\Delta C_t}$  values, and log[2] values are equivalent to  $-\Delta\Delta C_t$  values. RRID, Research Resource Identifiers available from <https://scicrunch.org/resources>; ER, estrogen receptor; neg, negative; pos, positive; na, status not available.
