# Supplementary material for: Association of the Telomerase Reverse Transcriptase rs10069690 Polymorphism with the Risk, Age at Onset and Prognosis of Triple Negative Breast Cancer
Source: MDPI journal article supplement (doi:10.3390/ijms24031825), 2023-01-17
Supplement: s1 [file s1]

**Table S1.** Clinical characteristics and genotype frequencies of TERT rs10069690 in the study population.

|                        |            | Sum | CC          | CT          | TT         |
|------------------------|------------|-----|-------------|-------------|------------|
| All subjects           |            | 649 | 326 (50.2%) | 270 (41.6%) | 53 (8.2%)  |
| Patients               |            | 403 | 203 (50.4%) | 168 (41.7%) | 32 (7.9%)  |
| Controls               |            | 246 | 123 (50.0%) | 102 (41.5%) | 21 (8.5%)  |
| Patient subpopulations |            |     |             |             |            |
| Age (years)            | <55        | 171 | 88 (51.5%)  | 66 (38.6%)  | 17 (9.9%)  |
|                        | ≥55        | 232 | 115 (49.6%) | 102 (44.0%) | 15 (6.5%)  |
| Menopausal status      | pre        | 100 | 54 (54.0%)  | 36 (36.0%)  | 10 (10.0%) |
|                        | post       | 248 | 125 (50.4%) | 105 (42.3%) | 18 (7.3%)  |
|                        | na         | 55  | 23 (41.8%)  | 27 (49.1%)  | 5 (9.1%)   |
| Tumor size             | pT1        | 174 | 84 (48.3%)  | 80 (46.0%)  | 10 (5.7%)  |
|                        | pT2-4      | 157 | 86 (54.8%)  | 55 (35.0%)  | 16 (10.2%) |
|                        | other, na  | 73  | 34 (46.6%)  | 33 (45.2%)  | 6 (8.2%)   |
| Tumor type             | ductal     | 245 | 123 (50.2%) | 101 (41.2%) | 21 (8.6%)  |
|                        | lobular    | 80  | 48 (60.0%)  | 27 (33.8%)  | 5 (6.3%)   |
|                        | other, na  | 78  | 32 (41.0%)  | 40 (51.3%)  | 6 (7.7%)   |
| Stage                  | 0-1        | 141 | 65 (46.1%)  | 65 (46.1%)  | 11 (7.8%)  |
|                        | 2-4        | 186 | 103 (55.4%) | 67 (36.0%)  | 16 (8.6%)  |
|                        | other, na  | 76  | 35 (46.1%)  | 36 (47.4%)  | 5 (6.6%)   |
| Grade                  | pG1-2      | 235 | 118 (50.2%) | 99 (42.1%)  | 18 (7.7%)  |
|                        | pG3        | 145 | 76 (52.4%)  | 57 (39.3%)  | 12 (8.3%)  |
|                        | na         | 23  | 9 (39.1%)   | 12 (52.2%)  | 2 (8.7%)   |
| Lymph node status      | pN0        | 193 | 93 (48.2%)  | 81 (42.0%)  | 19 (9.8%)  |
|                        | pN+        | 132 | 73 (55.3%)  | 53 (40.2%)  | 6 (4.5%)   |
|                        | na         | 72  | 37 (51.4%)  | 34 (47.2%)  | 1 (1.4%)   |
| ER status              | pos        | 270 | 142 (52.6%) | 112 (41.5%) | 16 (5.9%)  |
|                        | neg        | 117 | 54 (46.2%)  | 48 (41.0%)  | 15 (12.8%) |
|                        | na         | 16  | 7 (43.8%)   | 8 (50.0%)   | 1 (6.3%)   |
| PR status              | pos        | 186 | 101 (54.3%) | 74 (39.8%)  | 11 (5.9%)  |
|                        | neg        | 194 | 91 (46.9%)  | 84 (43.3%)  | 19 (9.8%)  |
|                        | na         | 23  | 11 (47.8%)  | 10 (43.5%)  | 2 (8.7%)   |
| HER2 status            | pos        | 74  | 38 (51.4%)  | 29 (39.2%)  | 7 (9.5%)   |
|                        | neg        | 293 | 144 (49.1%) | 126 (43.0%) | 23 (7.8%)  |
|                        | na         | 36  | 21 (58.3%)  | 13 (36.1%)  | 2 (5.6%)   |
| p53 status             | pos        | 91  | 38 (41.8%)  | 47 (51.6%)  | 6 (6.6%)   |
|                        | neg        | 257 | 134 (52.1%) | 101 (39.3%) | 22 (8.6%)  |
|                        | na         | 55  | 31 (56.4%)  | 20 (36.4%)  | 4 (7.3%)   |
| Ki67 pos cells         | <50%       | 278 | 146 (52.5%) | 113 (40.6%) | 19 (6.8%)  |
|                        | ≥50%       | 28  | 11 (39.3%)  | 12 (42.9%)  | 5 (17.9%)  |
|                        | na         | 97  | 46 (47.4%)  | 43 (44.3%)  | 8 (8.2%)   |
| Tumor Subtype          | Luminal A  | 233 | 119 (51.1%) | 99 (42.5%)  | 15 (6.4%)  |
|                        | Luminal B  | 41  | 22 (53.7%)  | 16 (39.0%)  | 3 (7.3%)   |
|                        | HER2 type  | 33  | 16 (48.5%)  | 13 (39.4%)  | 4 (12.1%)  |
|                        | Triple neg | 60  | 25 (41.7%)  | 27 (45.0%)  | 8 (13.3%)  |
|                        | na         | 36  | 21 (58.3%)  | 13 (36.1%)  | 2 (5.6%)   |

Numbers of all patients and controls, as well as number of patients in the indicated subpopulations are shown. Parenthesized numbers show the fraction of patients (%) with the indicated genotypes. ER, estrogen receptor; PR, progesterone receptor; na, status not available.
